# Supplementary material
Source: Springer Nature journal article supplement (https://www.springermedizin.de/resource/supplementary/12936_2013_3179_MOESM2_ESM.pdf/9545250)
Supplement: MOESM2 [file 9545250]

- Spurious/falsely labelled/falsified/counterfeit (SFFC) medicines are medicines that are deliberately and fraudulently mislabelled with respect to identity and/or source
- Substandard medicines (also called out of specification (OOS) products) are genuine medicines produced by manufacturers' authorized by the MRA which do not meet quality specifications set for them by national standards

WHO Fact sheet N°275, May 2012
